# Supplementary material for: The Core Might Change Anyhow We Define It: The Instability of Key Actors in Longitudinal Social Network Data
Source: Hindawi journal article supplement (doi:10.1155/2024/3956877), 2024-03-02
Supplement: f1 [file 3956877.f1.pdf]

# The core might change anyhow we define it: the instability of key actors in longitudinal social network data

## Supplementary material

### 1 Jaccard similarity of networks: figures and tables

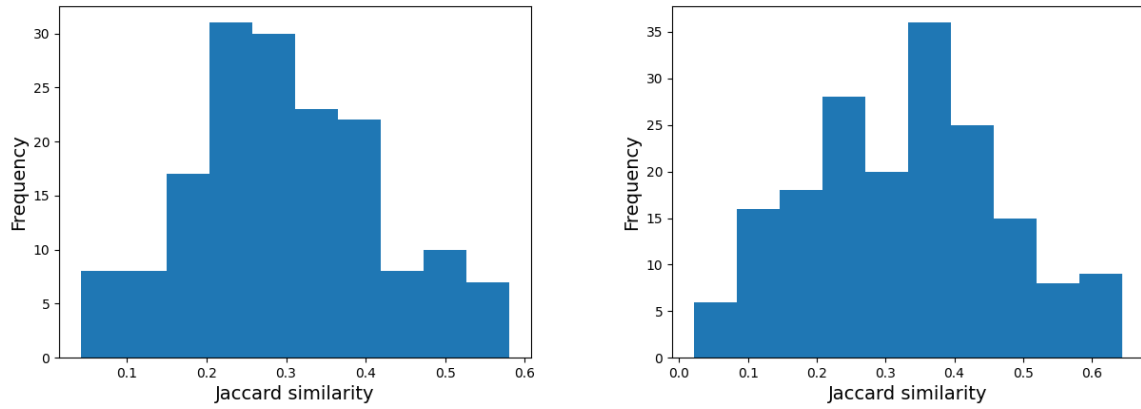

S1: The histograms of the Jaccard similarity values. The left side shows the histogram of the advice-seeking networks and the right side shows the histogram of the friendship networks.

S2: Wave-to-wave statistic of the Jaccard similarity values for the advice-seeking networks

| Wave   | Mean   | Variance | Min    | Max    |
|--------|--------|----------|--------|--------|
| 1 to 2 | 0.2855 | 0.0108   | 0.0799 | 0.523  |
| 2 to 3 | 0.319  | 0.0129   | 0.0827 | 0.5608 |
| 3 to 4 | 0.3151 | 0.0144   | 0.0417 | 0.581  |
| 4 to 5 | 0.2677 | 0.019    | 0.0455 | 0.5496 |

S3: Wave-to-wave statistic of the Jaccard similarity values for the friendship networks

| Wave   | Mean   | Variance | Min    | Max    |
|--------|--------|----------|--------|--------|
| 1 to 2 | 0.3658 | 0.011    | 0.1786 | 0.6146 |
| 2 to 3 | 0.3766 | 0.0135   | 0.161  | 0.6448 |
| 3 to 4 | 0.3829 | 0.0121   | 0.1854 | 0.5953 |
| 4 to 5 | 0.1384 | 0.0038   | 0.0208 | 0.2767 |

## 2 Centrality measures computed on the advice-seeking networks: figures and tables

S4: Monotonicity statistics for the centrality measures computed on the advice-seeking networks

| Centrality              | Mean   | Variance |
|-------------------------|--------|----------|
| In-Degree               | 0.7166 | 0.0078   |
| PageRank                | 0.9385 | 0.0053   |
| Two-Hop Neighbourhood   | 0.7663 | 0.0099   |
| Coreness                | 0.2616 | 0.0247   |
| Eigenvector             | 0.9841 | 0.0013   |
| Borda count aggregation | 0.9515 | 0.0013   |

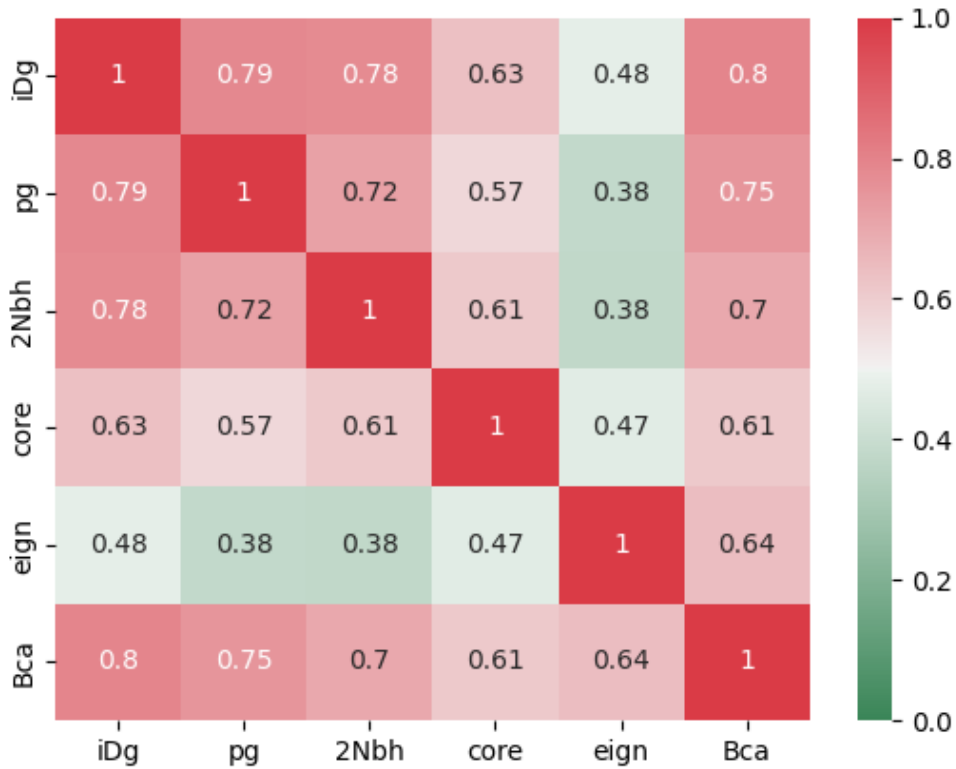

S5: The empirical mean of the Kendall tau correlation values computed on the advice-seeking networks. The variance is between 0.0086 and 0.0554. Abbreviations: iDg: in-degree, pg: PageRank, 2Nbh: two-hop neighbourhood, core: coreness, eign: eigenvector centrality, bca: Borda count aggregation

S6: The mean and variance of the sequence instability values with  $k = 1$  and using the Jaccard-distance, restricted to the classes for which we have observation data for 4 waves. Abbreviations: iDg: in-degree, pg: PageRank, 2Nbh: two-hop neighbourhood, core: coreness, eign: eigenvector centrality, cl: closeness, btw: betweenness, Bca: Borda count aggregation

| /    | advice-seeking  | friendship      |
|------|-----------------|-----------------|
| iDg  | 0.6315 (0.0317) | 0.7554 (0.0203) |
| pg   | 0.6667 (0.0885) | 0.7727 (0.0329) |
| 2Nbh | 0.7948 (0.0147) | 0.8670 (0.0172) |
| core | 0.4899 (0.0085) | 0.4266 (0.0060) |
| eign | 0.6701 (0.0512) | 0.5530 (0.0458) |
| cl   | -               | 0.7741 (0.0824) |
| btw  | -               | 0.7273 (0.0961) |
| Bca  | 0.6128 (0.1175) | 0.5227 (0.1062) |

S7: The mean and variance of the sequence instability values with  $k = 1$  and using the Jaccard-distance, restricted to the classes for which we have observation data for 5 waves. Abbreviations: iDg: in-degree, pg: PageRank, 2Nbh: two-hop neighbourhood, core: coreness, eign : eigenvector centrality, cl: closeness, btw: betweenness, Bca: Borda count aggregation

| /    | advice-seeking | friendship     |
|------|----------------|----------------|
| iDg  | 0.6528(0.0386) | 0.7702(0.0275) |
| pg   | 0.5891(0.0641) | 0.7790(0.0318) |
| 2Nbh | 0.6910(0.0476) | 0.8149(0.0135) |
| core | 0.4799(0.0206) | 0.4642(0.0092) |
| eign | 0.7152(0.0221) | 0.7878(0.0411) |
| cl   | -              | 0.8096(0.0204) |
| btw  | -              | 0.7513(0.0333) |
| Bca  | 0.6304(0.0565) | 0.7484(0.0358) |

S8: The mean and variance of the sequence instability values with  $k > 1$  and using the Jaccard-distance, restricted to the classes for which we have observation data for 4 waves. Abbreviations: iDg: in-degree, pg: PageRank, 2Nbh: two-hop neighbourhood, core: coreness, eign: eigenvector centrality, cl: closeness, btw: betweenness, Bca: Borda count aggregation. The number after the hyphen represents the k value.

| /      | advice-seeking  | friendship      |
|--------|-----------------|-----------------|
| iDg-3  | 0.6250 (0.0064) | 0.5592 (0.0056) |
| pg-5   | 0.6511 (0.0111) | 0.6547 (0.0194) |
| 2Nbh-3 | 0.6265 (0.0214) | 0.6205 (0.0177) |
| eign-5 | 0.6463 (0.0153) | 0.6511 (0.0323) |
| cl-5   | -               | 0.5700 (0.0085) |
| btw-5  | -               | 0.7548 (0.0098) |
| Bca-5  | 0.6395 (0.0055) | 0.6482 (0.0137) |

S9: The mean and variance of the sequence instability values with  $k > 1$  and using the Jaccard-distance, restricted to the classes for which we have observation data for 5 waves. Abbreviations: iDg: in-degree, pg: PageRank, 2Nbh: two-hop neighbourhood, core: coreness, eign: eigenvector centrality, cl: closeness, btw: betweenness, Bca: Borda count aggregation. The number after the hyphen represents the k value.

| /      | advice-seeking  | friendship      |
|--------|-----------------|-----------------|
| iDg-3  | 0.5317 (0.0093) | 0.6358 (0.0119) |
| pg-5   | 0.6481 (0.0135) | 0.7249 (0.0128) |
| 2Nbh-3 | 0.6159 (0.0104) | 0.6054 (0.0167) |
| eign-5 | 0.6476 (0.0111) | 0.7073 (0.0074) |
| cl-5   | -               | 0.6417 (0.0095) |
| btw-5  | -               | 0.7431 (0.0045) |
| Bca-5  | 0.5952 (0.0184) | 0.6712 (0.0084) |

S10: The mean and variance of the sequence instability values with  $k > 1$  and using the  $d_{SFH}$  distance, restricted to the classes for which we have observation data for 4 waves. Abbreviations: iDg: in-degree, pg: PageRank, 2Nbh: two-hop neighbourhood, core: coreness, eign: eigenvector centrality, cl: closeness, btw: betweenness, Bca: Borda count aggregation. The number after the hyphen represents the k value.

| /      | advice-seeking  | friendship      |
|--------|-----------------|-----------------|
| iDg-3  | 0.7245 (0.0145) | 0.8018 (0.0078) |
| pg-5   | 0.5748(0.0136)  | 0.6348(0.0150)  |
| 2Nbh-3 | 0.8148 (0.0075) | 0.8984 (0.0015) |
| eign-5 | 0.5921 (0.0116) | 0.6040 (0.0202) |
| cl-5   | -               | 0.7712 (0.0119) |
| btw-5  | -               | 0.6854 (0.0158) |
| Bca-5  | 0.5938 (0.0110) | 0.6126 (0.0098) |

S11: The mean and variance of the sequence instability values with  $k > 1$  and using the  $d_{SFH}$  distance, restricted to the classes for which we have observation data for 5 waves. Abbreviations: iDg: in-degree, pg: PageRank, 2Nbh: two-hop neighbourhood, core: coreness, eign: eigenvector centrality, cl: closeness, btw: betweenness, Bca: Borda count aggregation. The number after the hyphen represents the k value.

| /      | advice-seeking | friendship     |
|--------|----------------|----------------|
| iDg-3  | 0.7333(0.0203) | 0.8223(0.0066) |
| pg-5   | 0.5730(0.0160) | 0.7014(0.0100) |
| 2Nbh-3 | 0.7735(0.0190) | 0.8635(0.0074) |
| eign-5 | 0.5796(0.0143) | 0.6677(0.0084) |
| cl-5   | -              | 0.7752(0.0031) |
| btw-5  | -              | 0.6783(0.0059) |
| Bca-5  | 0.6251(0.0157) | 0.6931(0.0083) |

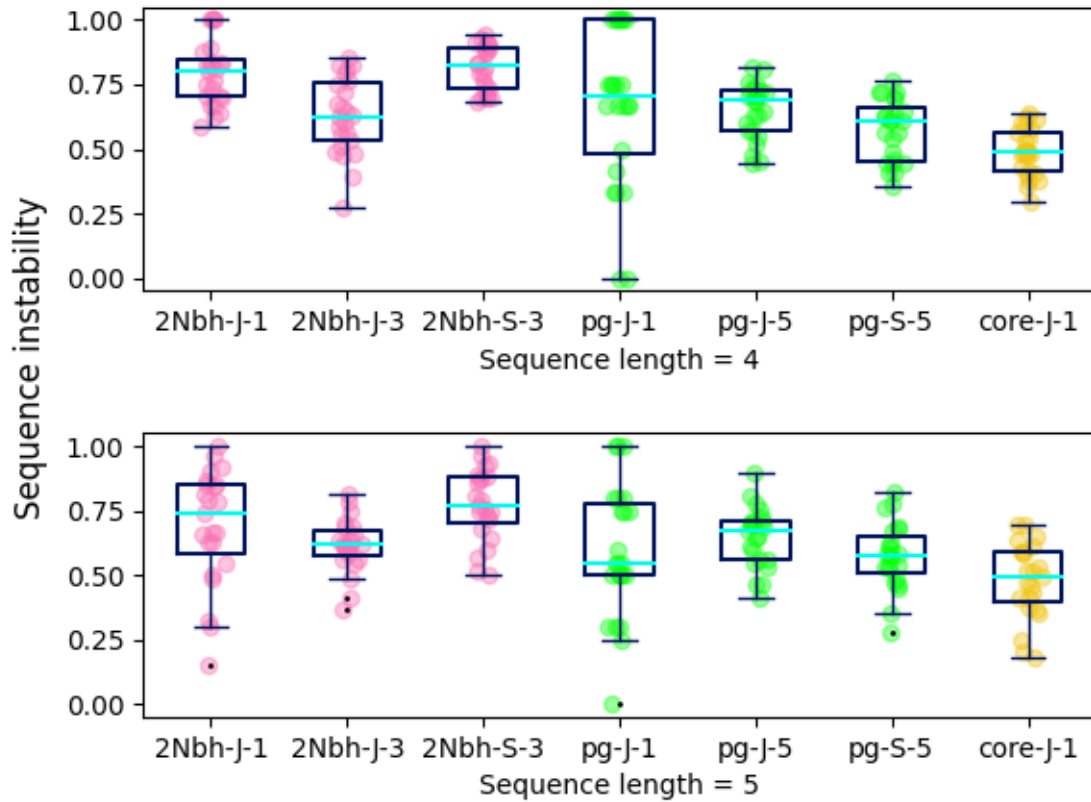

S12: Box plot of sequence instability values computed on the advice-seeking networks for the two-hop neighbourhood (2Nbh), PageRank (pg) and coreness (core) centrality measures. We separated the school classes into two groups: on the top plot we have observation data for 4 waves, on the bottom for 5 waves. The number after the hyphen represents the parameters of the sequence instability algorithm in the form : d-k, where  $d$  denotes the rank distance measure and k is the top-k parameter of the method. The d parameter can be "J" or "S", where "J" denotes the  $d_J$  Jaccard-distance and "S" stands for the  $d_{SFH}$  distance.

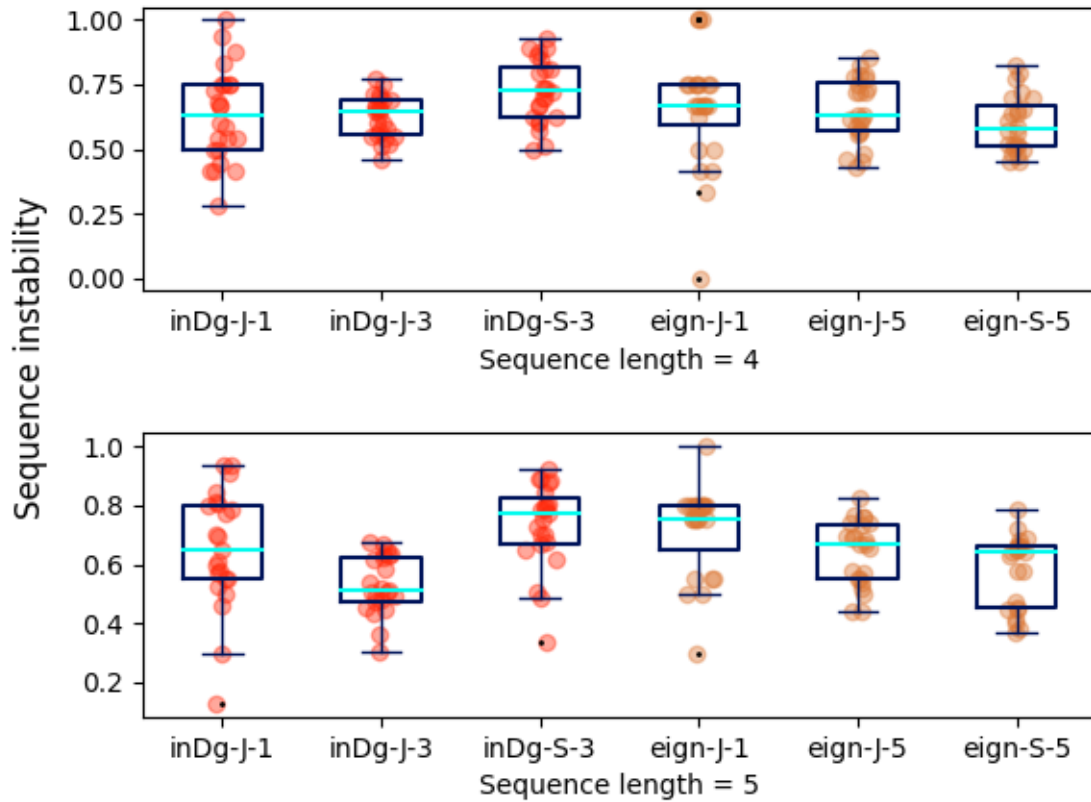

S13: Box plot of sequence instability values computed on the advice-seeking networks for the in-degree (iDg) and eigenvector (eign) centrality measures. We separated the school classes into two groups: on the top plot we have observation data for 4 waves, on the bottom for 5 waves. The number after the hyphen represents the parameters of the sequence instability algorithm in the form : d-k, where  $d$  denotes the rank distance measure and  $k$  is the top- $k$  parameter of the method. The  $d$  parameter can be "J" or "S", where "J" denotes the  $d_J$  Jaccard-distance and "S" stands for the  $d_{SFH}$  distance.

### 3 Centrality measures computed on friendship networks: figures and tables

S14: Monotonicity statistics for the centrality measures computed on the friendship networks

| Centrality              | Mean   | Variance |
|-------------------------|--------|----------|
| In-Degree               | 0.7589 | 0.0088   |
| PageRank                | 0.9862 | 0.001    |
| Two-Hop Neighbourhood   | 0.6885 | 0.0296   |
| Coreness                | 0.2433 | 0.0277   |
| Eigenvector             | 0.9957 | 0.0007   |
| Closeness               | 0.8603 | 0.005    |
| Betweenness             | 0.9206 | 0.0126   |
| Borda count aggregation | 0.9711 | 0.0003   |

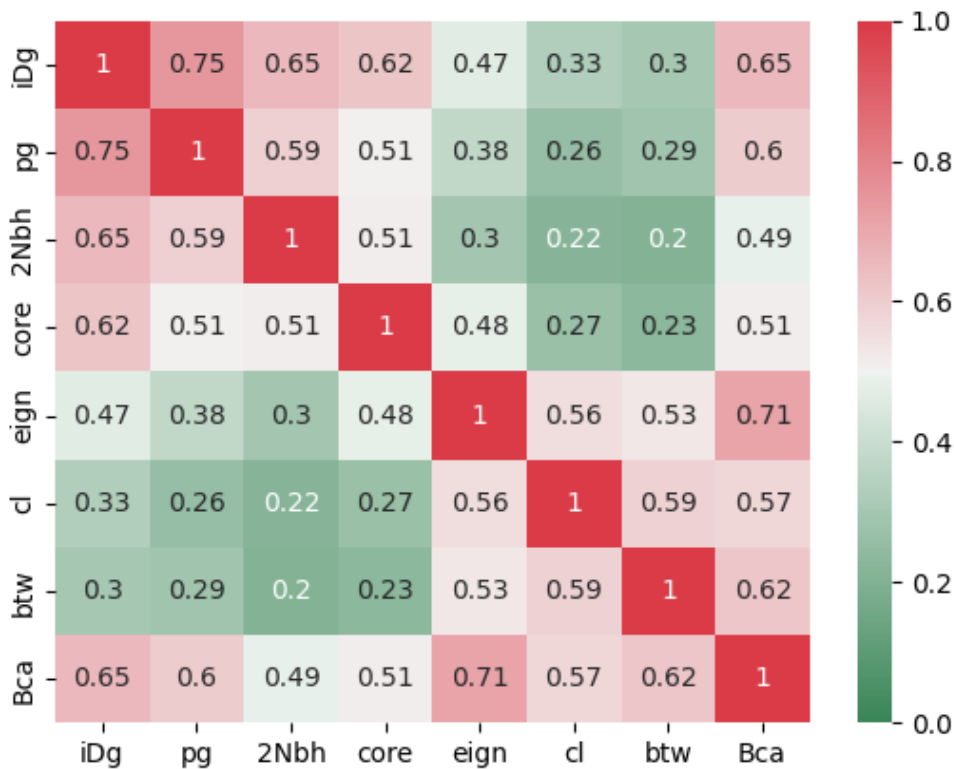

S15: The empirical mean of the Kendall tau correlation values computed on the friendship networks. The variance is between 0.0177 and 0.1064. Abbreviations: iDg: in-degree, pg: PageRank, 2Nbh: two-hop neighbourhood, core: coreness, eign: eigenvector centrality, cl: closeness, btw: betweenness, bca: Borda count aggregation



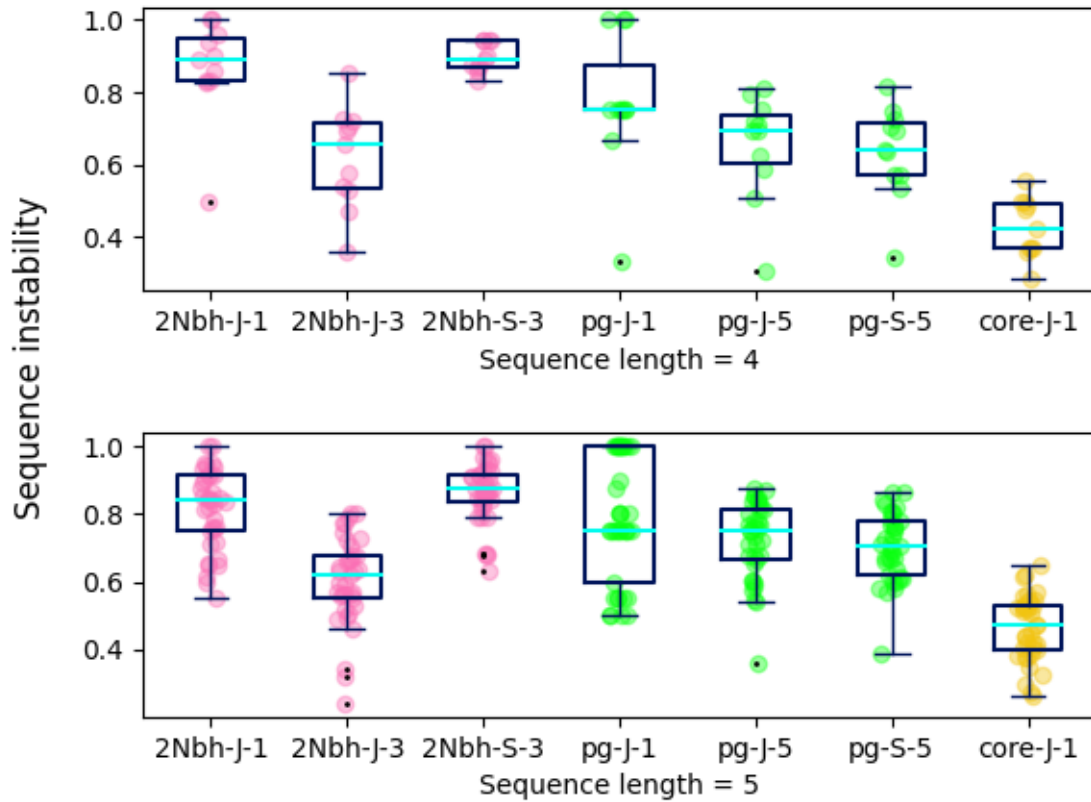

S16: Box plot of sequence instability values computed on the friendship networks for the two-hop neighbourhood (2Nbh), PageRank (pg) and coreness (core) centrality measures. We separated the school classes into two groups: on the top plot we have observation data for 4 waves, on the bottom for 5 waves. The number after the hyphen represents the parameters of the sequence instability algorithm in the form : d-k, where  $d$  denotes the rank distance measure and k is the top-k parameter of the method. The d parameter can be "J" or "S", where "J" denotes the  $d_J$  Jaccard-distance and "S" stands for the  $d_{SFH}$  distance.

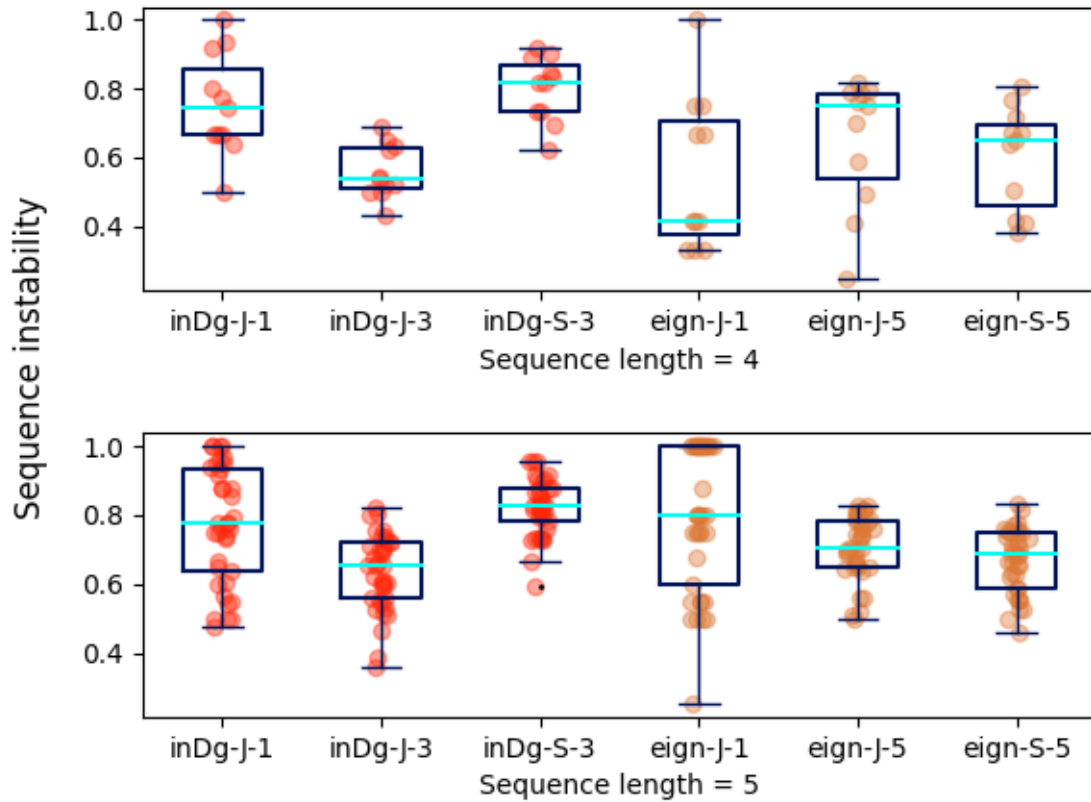

S17: Box plot of sequence instability values computed on the friendship networks for the in-degree (iDg) and eigenvector (eign) centrality measures. We separated the school classes into two groups: on the top plot we have observation data for 4 waves, on the bottom for 5 waves. The number after the hyphen represents the parameters of the sequence instability algorithm in the form : d-k, where  $d$  denotes the rank distance measure and  $k$  is the top-k parameter of the method. The  $d$  parameter can be "J" or "S", where "J" denotes the  $d_J$  Jaccard-distance and "S" stands for the  $d_{SFH}$  distance.

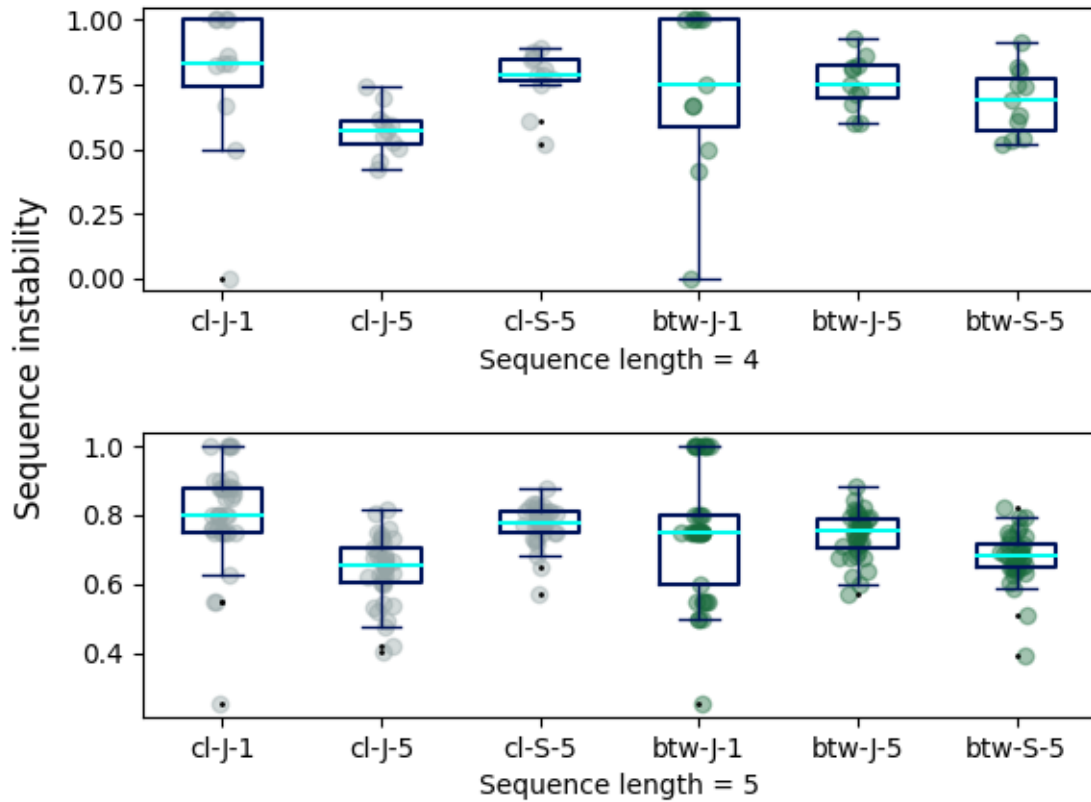

S18: Box plot of sequence instability values computed on the friendship networks for the closeness (cl) and betweenness (btw) centrality measures. We separated the school classes into two groups: on the top plot we have observation data for 4 waves, on the bottom for 5 waves. The number after the hyphen represents the parameters of the sequence instability algorithm in the form : d-k, where  $d$  denotes the rank distance measure and  $k$  is the top-k parameter of the method. The  $d$  parameter can be "J" or "S", where "J" denotes the  $d_J$  Jaccard-distance and "S" stands for the  $d_{SFH}$  distance.

#### 4 Aggregation of advice-seeking and friendship networks: figures and tables

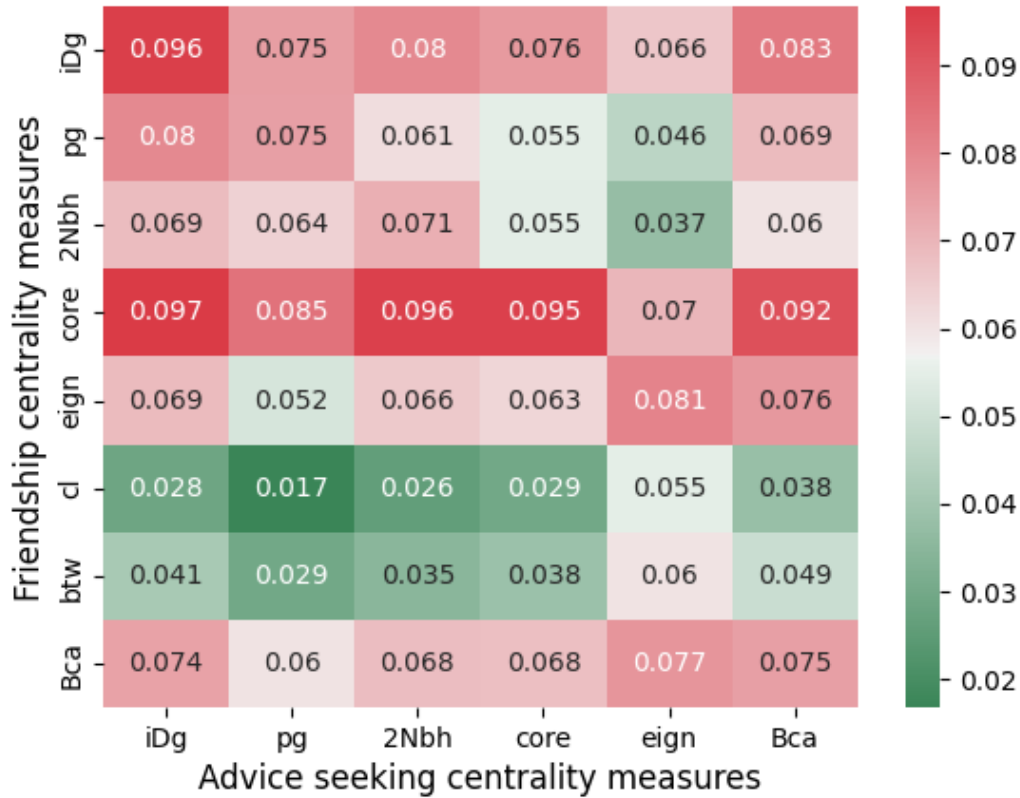

S19: The empirical mean of the Kendall tau correlation values between the centrality measures computed on the advice-seeking and the friendship networks. The variance is between 0.03 and 0.0809. Abbreviations: iDg: in-Degree, pg: PageRank, 2Nbh: two-hop neighbourhood, core: coreness, eign: eigenvector centrality, cl: closeness, btw: betweenness, Bca: Borda count aggregation

S20: The empirical mean of the Kendall tau correlation values computed between the aggregated measure over both advice-seeking and friendship networks and the other centrality measures. The variance is between 0.0129 and 0.0622. Abbreviations: iDg: in-degree, pg: PageRank, 2Nbh: two-hop neighbourhood, core: coreness, eign : eigenvector centrality, cl: closeness, btw: betweenness, Bca: Borda count aggregation

| Network type   | iDg  | pg   | 2Nbh | core | eign | cl   | btw  | bca  |
|----------------|------|------|------|------|------|------|------|------|
| advice-seeking | 0.43 | 0.39 | 0.38 | 0.36 | 0.37 | -    | -    | 0.44 |
| friendship     | 0.53 | 0.48 | 0.41 | 0.45 | 0.55 | 0.43 | 0.48 | 0.65 |

## 5 Wave to wave correlation of the centrality measures

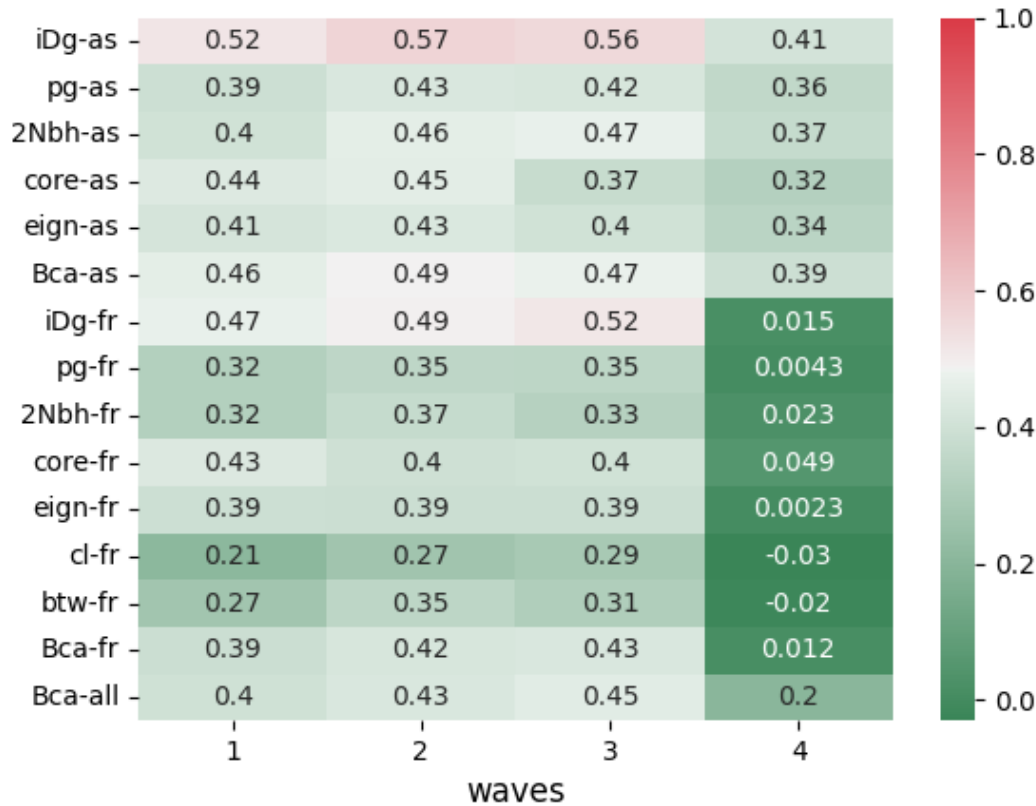

S21: The wave-to-wave empirical mean of the Kendall tau correlation values. The variance values are between 0.018 and 0.106 in all cases. Abbreviations: iDg: in-degree, pg: PageRank, 2Nbh: two-hop neighbourhood, core: coreness, eign: eigenvector centrality, cl: closeness, btw: betweenness, Bca: Borda count aggregation. Where the meaning of the suffixes as and fr are advice-seeking network and friendship network. The Bca-all centrality measure is the aggregation of all the centrality measures over both network types.

## 6 Analysis of the core: figures and tables

S22: The mean and the variance of the core size and the relative core size of the advice-seeking (as) and friendship (fr) networks

| Description             | Wave 1        | Wave 2        | Wave 3        | Wave 4        | Wave 5        |
|-------------------------|---------------|---------------|---------------|---------------|---------------|
| Core size (as)          | 11.87 (25.59) | 10.53 (24.78) | 12.55 (39.95) | 11.96 (27.82) | 11.08 (23.23) |
| Relative core size (as) | 0.59 (0.06)   | 0.55 (0.05)   | 0.6 (0.06)    | 0.6 (0.06)    | 0.6 (0.05)    |
| Core size (fr)          | 12.52 (15.21) | 12.68 (23.15) | 12.31 (20.05) | 11.5 (18.25)  | 12.5 (17.51)  |
| Relative core size (fr) | 0.68 (0.04)   | 0.68 (0.04)   | 0.66 (0.04)   | 0.63 (0.05)   | 0.67 (0.04)   |

S23: The mean and the variance of the number of common items and the relative number of common items of the core grouped by network type (advice-seeking or friendship) and number of available waves (4 or 5)

| Description                     | Network type   | Waves | Mean | Variance |
|---------------------------------|----------------|-------|------|----------|
| Number of common items          | advice-seeking | 4     | 4.92 | 7.16     |
| Relative number of common items | advice-seeking | 4     | 0.24 | 0.01     |
| Number of common items          | advice-seeking | 5     | 3.43 | 9.2      |
| Relative number of common items | advice-seeking | 5     | 0.18 | 0.03     |
| Number of common items          | friendship     | 4     | 4.91 | 3.17     |
| Relative number of common items | friendship     | 4     | 0.3  | 0.01     |
| Number of common items          | friendship     | 5     | 3.7  | 4.75     |
| Relative number of common items | friendship     | 5     | 0.2  | 0.01     |

S24: The number of cases when the opinion leaders induced by the other centrality measures are in the core of the advice-seeking networks.

| Centrality             | Network type   | Nr. of cases in the core | Total number of cases | Rate |
|------------------------|----------------|--------------------------|-----------------------|------|
| In-degree              | advice-seeking | 317                      | 333                   | 0.95 |
| PageRank               | advice-seeking | 195                      | 212                   | 0.92 |
| Two-Hop neighbourhood  | advice-seeking | 373                      | 409                   | 0.91 |
| Eigenvector centrality | advice-seeking | 195                      | 211                   | 0.92 |
| Borda-count            | advice-seeking | 233                      | 239                   | 0.97 |
| In-degree              | friendship     | 196                      | 322                   | 0.61 |
| PageRank               | friendship     | 120                      | 202                   | 0.59 |
| Two-Hop neighbourhood  | friendship     | 322                      | 516                   | 0.62 |
| Coreness               | friendship     | 1506                     | 2433                  | 0.62 |
| Eigenvector centrality | friendship     | 125                      | 200                   | 0.62 |
| Closeness              | friendship     | 158                      | 260                   | 0.61 |
| Betweenness            | friendship     | 133                      | 201                   | 0.66 |
| Borda-count            | friendship     | 154                      | 229                   | 0.67 |
| Borda-count            | both           | 198                      | 222                   | 0.9  |

S25: The number of cases when the opinion leaders induced by the other centrality measures are in the core of the friendship networks.

| Centrality             | Network type   | Nr. of cases in the core | Total number of cases | Rate |
|------------------------|----------------|--------------------------|-----------------------|------|
| In-degree              | advice-seeking | 201                      | 312                   | 0.64 |
| PageRank               | advice-seeking | 129                      | 200                   | 0.65 |
| Two-Hop neighbourhood  | advice-seeking | 248                      | 386                   | 0.64 |
| Coreness               | advice-seeking | 1506                     | 2303                  | 0.65 |
| Eigenvector centrality | advice-seeking | 122                      | 200                   | 0.61 |
| Borda-count            | advice-seeking | 140                      | 226                   | 0.62 |
| In-degree              | friendship     | 383                      | 393                   | 0.97 |
| PageRank               | friendship     | 213                      | 232                   | 0.92 |
| Two-Hop neighbourhood  | friendship     | 535                      | 590                   | 0.91 |
| Eigenvector centrality | friendship     | 221                      | 230                   | 0.96 |
| Closeness              | friendship     | 213                      | 299                   | 0.71 |
| Betweenness            | friendship     | 166                      | 231                   | 0.72 |
| Borda-count            | friendship     | 251                      | 259                   | 0.97 |
| Borda-count            | both           | 204                      | 222                   | 0.92 |
